# Supplementary material for: Laser-induced alloying Au–Pd and Ag–Pd colloidal mixtures: the formation of dispersed Au/Pd and Ag/Pd nanoparticlesElectronic supplementary information (ESI) available: TEM images of the molar ratios 2∶1 for both Au–Pd and Ag–Pd colloids. See http://www.rsc.org/suppdata/jm/b2/b200587e/.
Source: Royal Society of Chemistry journal article supplement (doi:10.1039/b200587e), 2002-03-26
Supplement: b200587e.doc [file b200587e.doc]

**J. Mater. Chem.**

**Laser-induced Alloying Au-Pd and Ag-Pd Colloidal Mixtures: The Formation of Dispersed Au/Pd and Ag/Pd Nanoparticles**

**(Electronic Supplementary Information)**

Yu-Hung Chen, Yao-Hung Tseng, and Chen-Sheng Yeh*

*Department of Chemistry*

*National Cheng Kung University*

*Tainan, Taiwan 701, R.O.C*

*Author to whom correspondence should be addressed. E-mail address: csyeh@mail.ncku.edu.tw


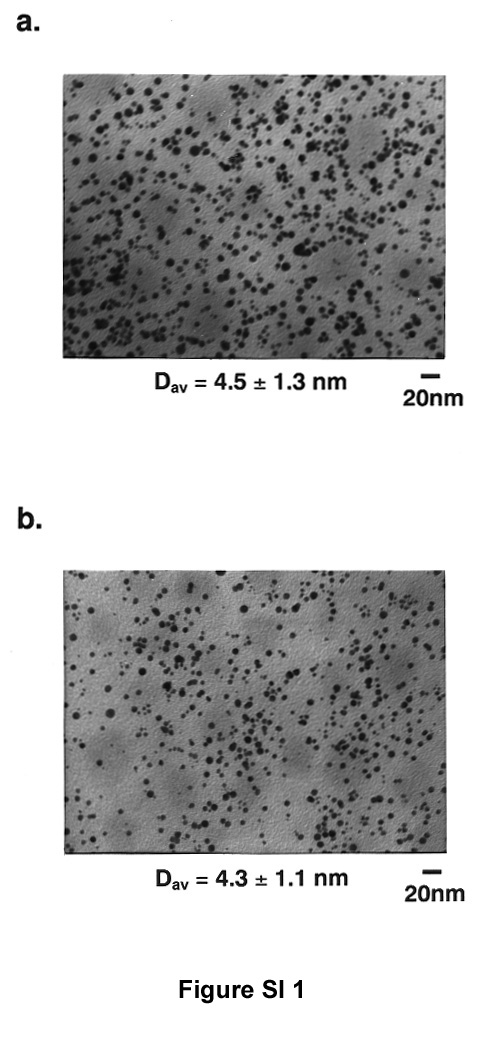


Figure SI 1: TEM images of the 2/1 molar ratio (Au/Pd) colloidal suspensions corresponding to (a) 20 min and (b) 40 min irradiation times.


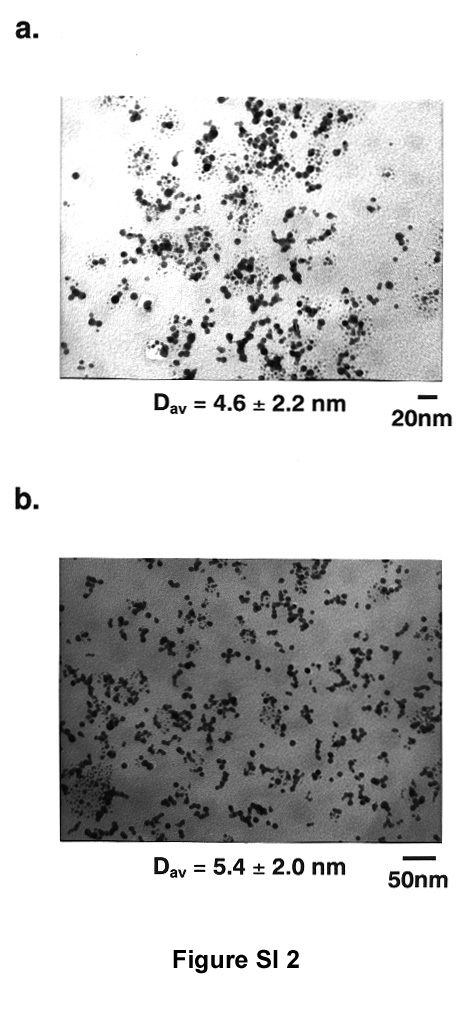


Figure SI 2: TEM images of the Ag/Pd (2/1) colloids corresponding to (a) 10 min and (b) 20 min irradiation times. If the irregular shapes were not precluded from counting, the bimetallic particles would exhibit a much wider size distribution for both (a) and (b) colloids.
